# Supplementary material for: Sequential activation of transcriptional repressors promotes progenitor commitment by silencing stem cell identity genes
Source: eLife. 2020 Nov 26;9:e56187. doi: 10.7554/eLife.56187 (PMC7728440; doi:10.7554/eLife.56187)
Supplement: Figure 1—figure supplement 1—source data 1. [file elife-56187-fig1-figsupp1-data1.xlsx]

## Sheet: Sheet1
NBs											Average	SD	P-value	INPs											Average	SD	P-value
control 0 hrs	6837	6286	4739	7256	5263	5620	5520	6980	6520	5261	6028.2	835.839		control 0 hrs	225	246	241	222	168	185	265	195	232	221	220	27.3774
control 6 hrs	6820	7561	7512	5960	5562	6230	6190	5862	6520	5542	6375.9	708.141	0.341559	control 6 hrs	211	145	112	256	185	241	195	186	112	139	178.2	46.6656	0.0363146
control 12 hrs	6920	7250	6821	6985	7265	6895	6932	5821	4520	5862	6527.1	845.183	0.212755	control 12 hrs	118	186	85	95	86	212	185	65	35	96	116.3	54.1111	9.15611e-05
control 18 hrs	6532	4221									5376.5	1334.26	0.403614	control 18 hrs	121	165									143	19.6774	0.0074429
control 24 hrs	6895	6888	7258	7523	7523	7221	7812	6844	5862	6953	7077.9	523.78	0.00420267	control 24 hrs	215	115	168	295	154	221	186	156	225	321	205.6	59.4742	0.527752
											Average	SD	P-value												Average	SD	P-value
UAS-CG6520FL-myc 0 hrs	5891	7214	6525	7520	5820	4923	6264	5920	6850	7120	6404.7	773.182		UAS-CG6520FL-myc 0 hrs	126	165	102	165	261	250	189	258	326	186	202.8	64.1647
UAS-CG6520FL-myc 6 hrs	5241	6953	3526	6952	6532	5986	5862	5860	6520	6210	5964.2	980.592	0.291916	UAS-CG6520FL-myc 6 hrs	156	162	195	195	95	112	165	152	168	215	161.5	34.0231	0.113249
UAS-CG6520FL-myc 12 hrs	2960	2860	3325	2122	2632	5982	5562	3965	4652	3935	3799.5	1241.05	3.29738e-05	UAS-CG6520FL-myc 12 hrs	1265	1253	1125	1056	1352	653	585	485	521	940	923.5	310.035	2.97572e-06
UAS-CG6520FL-myc 18 hrs	1352	1986	586	1565	575	625	865	496	1236	408	969.4	520.83	6.20257e-13	UAS-CG6520FL-myc 18 hrs	3594	1568	1845	1956	2150	2689	2598	1589	2611	1865	2246.5	582.367	6.45686e-09
UAS-CG6520FL-myc 24 hrs	138	295	257	278	328	116	123	359	268	117	227.9	92.0989	2.99914e-15	UAS-CG6520FL-myc 24 hrs	1514	2061	2562	2212	1856	1568	1655	2055	1956	2061	1950	294.517	1.60757e-12
	0	6	12	18	24		0	6	12	18	24				0	6	12	18	24		0	6	12	18	24
Wor-Gal4 > -	6028.2	6375.9	6257.1	5376.5	7077.9		835.94	708.14	845.18	1334.26	523.78			Wor-Gal4 > -	220	178.2	116.3	143	205.6		27.37	46.67	54.1	19.68	59.47
Wor-Gal4 > UAS-insbFL-myc	6404.7	5964.2	3799.5	969.4	227.9		773.18	980.59	1241.05	520.83	92.1			Wor-Gal4 > UAS-insbFL-myc	202.8	161.5	923.5	2246.5	1950		64.16	34.02	310.04	582.37	294.52
