# Supplementary material for: Sequential activation of transcriptional repressors promotes progenitor commitment by silencing stem cell identity genes
Source: eLife. 2020 Nov 26;9:e56187. doi: 10.7554/eLife.56187 (PMC7728440; doi:10.7554/eLife.56187)
Supplement: Figure 2—source data 1. [file elife-56187-fig2-data1.xlsx]

## Sheet: control
series	NBII (dpn+ase-)
series 020	8
series 018	9
series 016	8
series 014	8
series 012	8
series 010	8
series 008	8
series 006	8
series 004	8
series 002	8
n	10
average	8.1
stadev	0.3

## Sheet: tllRNAi34329
series	NBII (dpn+ase-)
series 019	6
series 017	4
series 015	3
series 013	6
series 011	5
series 009	5
series 007	3
series 005	5
series 003	3
series 001	3
n	10
average	4.3
stadesv	1.18743

## Sheet: statistics
	control	tllRNAi
	9	6			8.1	4.3
	8	4			0.3	1.18743
	8	3
	8	6
	8	5
	8	5
	8	3
	8	5
	8	3
		3
t.test	2.37666e-06	***
