# Supplementary material for: Sequential activation of transcriptional repressors promotes progenitor commitment by silencing stem cell identity genes
Source: eLife. 2020 Nov 26;9:e56187. doi: 10.7554/eLife.56187 (PMC7728440; doi:10.7554/eLife.56187)
Supplement: Figure 2—source data 2. [file elife-56187-fig2-data2.xlsx]

## Sheet: 9D11,tubGal80ts_UAS-Tll
series	NBII (dpn+ase-)
series 023	146
series 021	156
series 019	175
series 017	178
series 015	158
series 013	195
series 011	240
series 009	250
series 007	97
series 005	95
series 003	100
series 001	119
average	159.083
stadesv	49.9624

## Sheet: tubgal80ts_+ CONTROL
series	NBII (dpn+ase-)
series 025	8
series 023	8
series 019	9
series 017	8
series 015	8
series 012	8
series 010	8
series 008	9
series 006	8
average	8.22222
stadesv	0.41574
