# Supplementary material for: Sequential activation of transcriptional repressors promotes progenitor commitment by silencing stem cell identity genes
Source: eLife. 2020 Nov 26;9:e56187. doi: 10.7554/eLife.56187 (PMC7728440; doi:10.7554/eLife.56187)
Supplement: Figure 2—source data 3. [file elife-56187-fig2-data3.xlsx]

## Sheet: Sheet1
2020-11-9 tll oe in ventral area											Average	SD	P-value
con	28	29	32	33	28	28	26	28	30	28	29	2.05196
tll oe	10	8	15	9	11						10.6	2.54733	1.9913e-09
