# Supplementary material for: Sequential activation of transcriptional repressors promotes progenitor commitment by silencing stem cell identity genes
Source: eLife. 2020 Nov 26;9:e56187. doi: 10.7554/eLife.56187 (PMC7728440; doi:10.7554/eLife.56187)
Supplement: Figure 3—figure supplement 1—source data 1. [file elife-56187-fig3-figsupp1-data1.xlsx]

## Sheet: Sheet2
ctrl	TRiP.JF02270
8	8
8	13
7	10
8	8
8	10
8	8
8	10
8	8
7.875	9.375	7.9	9.8
0.353553	1.76777	0.4	1.8
