# Supplementary material for: Sequential activation of transcriptional repressors promotes progenitor commitment by silencing stem cell identity genes
Source: eLife. 2020 Nov 26;9:e56187. doi: 10.7554/eLife.56187 (PMC7728440; doi:10.7554/eLife.56187)
Supplement: Figure 3—source data 1. [file elife-56187-fig3-data1.xlsx]

## Sheet: TF RNAi data
	Ctrl	aseRNAi 44552	D RNAi 34672	D RNAi 26217	hamRNAi 26728	hamRNAi 32470	opaRNAi 34706
brain 1	35	30	29	31	75	51	39
brain 2	36	28	28	30	72	52	41
brain 3	33	28	30	48	75	75	36
brain 4	34	23	33	39	71	84	37
brain 5	25	26	28	48	43	63	36
brain 6	24	25	29	41	45	61	34
brain 7	35		28	38	190	254	31
brain 8	37		25	42	162	232	35
brain 9	35		25	43	62	177	44
brain 10	33		28	35	57	184	43
brain11	36		26	33	138	318	39
brain 12	28		27	32	146	260	37
brain 13	28		31	33	37	225	40
brain 14	30		27	29	45	223	37
brain 15	37		22	43	144	197	38
brain 16	36		23	44	112	270	34
brain 17	25		25	33	51	298	40
brain 18	28		24	32	53	86	41
brain 19	19		26	33	105	82	40
brain 20	24		26	34	92	112	36
brian 21	20		43	39	89	89	39
brain 22	26		36	42	85	198	45
brain 23	25		37	33		100
brain 24	34		36	38		110
brain 25	31			47		163
brain 26	24			42		176
brain 27	30			43
brain 28	31			38
brain 29	38			41
brain 30	33			51
brain 31	32			38
brain 32	52			34
brain 33	48			37
brain 34	29			39
brain 35	32			34
average	31.5143	26.6667	28.8333	38.2	88.5909	159.231	38.2727
stdev	6.80558	2.50333	5.00145	5.62975	43.2057	83.1891	3.42514
