# Supplementary material for: Sequential activation of transcriptional repressors promotes progenitor commitment by silencing stem cell identity genes
Source: eLife. 2020 Nov 26;9:e56187. doi: 10.7554/eLife.56187 (PMC7728440; doi:10.7554/eLife.56187)
Supplement: Figure 3—source data 2. [file elife-56187-fig3-data2.xlsx]

## Sheet: Control (wt larvae)
Series	NBII (Dpn+Ase-)
Series 029	8
Series 027	8
Series 025	8
Series 021	8
Series 019	8
Series 017	8
Series 015	8
Series 013	8
Series 011	8
Series 009	8
Series 006	8
Series 004	8
n	12
Average	8
DesVest	0

## Sheet: statistics NBII#
	control	Df7071	Df7071/ham1
	8	8	8
	8	9	9
	8	10	9
	8	10	8
	8	8	9
	8	9	9
	8	8	10
	8	8	12
	8	9	9
	8	11	8
	8	9	8
	8	9	10
			9
			10
			10
			8
n	12	12	17
average	8	9	9.125
desves	0	0.953463	1.08781
ttest (vs. control)		0.00393471	0.00087837
t.test (vs. Df7071)			0.74931
