# Supplementary material for: Sequential activation of transcriptional repressors promotes progenitor commitment by silencing stem cell identity genes
Source: eLife. 2020 Nov 26;9:e56187. doi: 10.7554/eLife.56187 (PMC7728440; doi:10.7554/eLife.56187)
Supplement: Figure 3—source data 3. [file elife-56187-fig3-data3.xlsx]

## Sheet: ham -_+,erm-_+ 25
Series	NB#
series 035	13
series 031	11
Series 029	14
series 025	10
series 023	14
series 021	19
series 019	14
series 017	14
series 015	13
series 011	15
series 009	11
series 007	16
series 005	16
series 003	16
series 001	14
average	14
desVest	2.36852

## Sheet: ham -_- 25
Series	NB#
series 009	55
series 007	58
series 005	37
series 003	58
series 001	45
series 035	51
series 033	36
series 031	35
series 025	30
series 023	32
series 021	35
series 019	28
series 017	34
series 015	51
series 013	33
series 011	32
series 009	28
series 007	37
series 005	42
series 003	42
series 001	48
average	40.3333
stadesv	9.49854

## Sheet: ham -_-,erm-_+ 25
Series	NB#
series 017	90
series 015	65
series 013	56
series 011	73
series 009	53
series 007	82
series 005	63
series 003	112
series 001	92
average	76.2222
stadesv	18.2925
