# Supplementary material for: Sequential activation of transcriptional repressors promotes progenitor commitment by silencing stem cell identity genes
Source: eLife. 2020 Nov 26;9:e56187. doi: 10.7554/eLife.56187 (PMC7728440; doi:10.7554/eLife.56187)
Supplement: Figure 3—source data 4. [file elife-56187-fig3-data4.xlsx]

## Sheet: cntrl Df7071_erm2
Series	NBII #
series 013	13
series 011	11
series 009	11
series 007	14
series 005	12
series 003	11
series 001	12
series 003	16	other sanple
series 001	14	other sanple
n	9
average	12.6667
staDesv	1.63299

## Sheet: statistics
	control	Ham full length
	11	9
	11	8
	10	10
	14	8
	12	8
	11	8
	12	7
	16	9
	14	8
		8
		7
		8
		7
		8
		7
		10
		9
		8
		8
		8
		9
		8
		8
	12.3333	8	8.16667
	1.93649		0.816497
t.test		0.000143536
