# Supplementary material for: Sequential activation of transcriptional repressors promotes progenitor commitment by silencing stem cell identity genes
Source: eLife. 2020 Nov 26;9:e56187. doi: 10.7554/eLife.56187 (PMC7728440; doi:10.7554/eLife.56187)
Supplement: Figure 4—source data 1. [file elife-56187-fig4-data1.xlsx]

## Sheet: FRT40A clones
Series	# Nbs (Dpn+Ase-)
series 036	1
series 031	1
series 025	1
series 013	1
series 011	1
series 009	1
series 006	1
series 017	1
series 001	1
n	9
average	1
stadesv	0

## Sheet: FRT40A Hamnull clones
Series	# Nbs (Dpn+Ase-)
series 054	7
series 037	1
series 045	1
series 043	1
series 031	2
series 032	3
series 022	2
series 015	4
series 010	2
series 002	2
	2.5
	1.74642

## Sheet: FRT40A ham1 clones
Series	# Nbs (Dpn+Ase-)
series 021	1
series 016	1
series 014	1
series 008	1
series 006	1
	1
	0
