# Supplementary material for: Sequential activation of transcriptional repressors promotes progenitor commitment by silencing stem cell identity genes
Source: eLife. 2020 Nov 26;9:e56187. doi: 10.7554/eLife.56187 (PMC7728440; doi:10.7554/eLife.56187)
Supplement: Figure 4—source data 2. [file elife-56187-fig4-data2.xlsx]

## Sheet: Sheet1
	Type II NB #
	Wor> tubGal80ts
	Ctrl	>ham	>hamDZF2
brain 1	7	0	0
brain 2	8	0	0
brain 3	8	0	0
brain 4	8	0	0
brain 5	8	0	0
brain 6	8	0	0
brain 7	8	0	0
brain 8	7	0	0
brain 9
brain 10
brain 11
brain 12
average	7.75	0	0
st dev.	0.46291	0	0
