# Supplementary material for: Sequential activation of transcriptional repressors promotes progenitor commitment by silencing stem cell identity genes
Source: eLife. 2020 Nov 26;9:e56187. doi: 10.7554/eLife.56187 (PMC7728440; doi:10.7554/eLife.56187)
Supplement: Figure 4—source data 3. [file elife-56187-fig4-data3.xlsx]

## Sheet: statistics
	ham-/-	hamFL	hamDeltaZF2	ERDhamZf1
	121	12	10	17
	140	12	13	16
	163	11	12	13
	98	10	11	10
	108	10	12	11
	70	12	12	15
	140	11	14	16
	134	12	10	14
	145	10	13	14
		10
		8
		14
		12
n	9	13	9	9
average	124.333	11.0769	11.8889	14
staDesv	26.7291	1.4391	1.2862	2.21108
t.test (vs. control)		2.11117e-06	2.21959e-06	2.42377e-06
t.test (vs. hamFL)			0.2036	0.00601148
