# Supplementary material for: Sequential activation of transcriptional repressors promotes progenitor commitment by silencing stem cell identity genes
Source: eLife. 2020 Nov 26;9:e56187. doi: 10.7554/eLife.56187 (PMC7728440; doi:10.7554/eLife.56187)
Supplement: Figure 4—source data 4. [file elife-56187-fig4-data4.xlsx]

## Sheet: statistics
	wt	VP16HamZf1
	8	12
	8	13
	8	25
	8	12
	8	14
	8	18
	8	21
	9	15
	8	18
	8	23
average	8.1	17.1
StaDesv	0.3	4.43734
		0.000178917
