# Supplementary material for: Sequential activation of transcriptional repressors promotes progenitor commitment by silencing stem cell identity genes
Source: eLife. 2020 Nov 26;9:e56187. doi: 10.7554/eLife.56187 (PMC7728440; doi:10.7554/eLife.56187)
Supplement: Figure 5—source data 1. [file elife-56187-fig5-data1.xlsx]

## Sheet: Oregon WT control
series	NBII (dpn+ase-)
series 025	8
series 023	8
series 019	9
series 017	8
series 015	8
series 012	8
series 010	8
series 008	9
series 006	8
average	8.22222
stadesv	0.41574

## Sheet: erm2,hamDf_+
series	NBII (dpn+ase-)
series 027	13
series 025	10
series 023	11
series 012	10
series 010	13
series 008	9
series 006	9
series 004	11
series 001	11
series 038	11
series 028	12
series 025	11
average	10.9167
stadesv	1.25554

## Sheet: erm2,hamDf_+;tll49_+
series	NBII (dpn+ase-)
series 054	8
series 050	8
series 041	8			13	8
series 035	8			10	8
series 032	8			11	8
series 030	8			10	8
series 030	8			13	8
series 011	9			9	8
series 008	9			9	8
series 003	9			11	9
				11	9
average	8.3			11	9
stadesv	0.458258			12
				11
					1.42099e-05	Pvalue
