# Supplementary material for: Sequential activation of transcriptional repressors promotes progenitor commitment by silencing stem cell identity genes
Source: eLife. 2020 Nov 26;9:e56187. doi: 10.7554/eLife.56187 (PMC7728440; doi:10.7554/eLife.56187)
Supplement: Figure 5—source data 2. [file elife-56187-fig5-data2.xlsx]

## Sheet: Sheet1
	ham-/+,erm-/+	ham-/+,erm-/+_PBacTllGFP
	10	13
	12	17
	11	14
	10	14
	12	15
	11	14
	10	18
	12	17
	13	15
	11	19
	10	14
		15
n	11	12
average	11.0909	15.4167
stadev	0.995859	1.80085
t.test	2.25121e-06	***
