# Supplementary material for: Sequential activation of transcriptional repressors promotes progenitor commitment by silencing stem cell identity genes
Source: eLife. 2020 Nov 26;9:e56187. doi: 10.7554/eLife.56187 (PMC7728440; doi:10.7554/eLife.56187)
Supplement: Figure 5—source data 3. [file elife-56187-fig5-data3.xlsx]

## Sheet: erm oe
wild-type type II NB	Tll-GFP	Dpn	Fold change compared to 4'-002 Dpn (C2/Cx=?)	Corrective value (Bx*Dx=?)	Fold change (Ex/E2=?)
34-14-2	32.184	86.525	1	32.184	1
019-14	33.63	127	0.681299	22.9121	0.711909
34-14-1	29.188	57.88	1.4949	43.6332	1.35574
032-18	26.719	94.057	0.919921	24.5794	0.763714
030-27	26.556	95.812	0.903071	23.9819	0.745151				#2	Average	SD	P-value
032-15-1	30.17	109.826	0.787837	23.769	0.738536				control Ase-	0.91	0.22
026-10	33.08	112.75	0.767406	25.3858	0.78877				Ase-	0.77	0.21	0.180694
028-8	38.917	142.543	0.60701	23.623	0.733998				Ase+	0.59	0.18	0.00394057
032-15-2	44.333	103.667	0.834644	37.0023	1.14971					0.991	0.286
017-5	48.286	120.235	0.719632	34.7482	1.07967					1.021	0.279	0.707
					0.90672	0.219045				0.349	0.2	1.34e-05
erm overexpression
Ase+ type II NB
001-11	26.38	121.062	0.714716	18.8542	0.585826
003-22	39.038	95.679	0.904326	35.3031	1.09691
006-08	34.378	128.377	0.673991	23.1705	0.719938
006-11	22.562	76.043	1.13784	25.672	0.797664
008-5	31.062	176.237	0.490958	15.2501	0.473842
008-13	49.948	157.701	0.548665	27.4047	0.851501
012-15	17.703	87.519	0.988642	17.5019	0.543809
014-16	34.923	109.911	0.787228	27.4924	0.854224
014-18	31.183	125.717	0.688252	21.4618	0.666846
017-13	29.875	72.763	1.18913	35.5254	1.10382
					0.769439	0.209949	0.180694
Ase- type II NB
001-16	28.694	101.286	0.854264	24.5123	0.761629
003-6	35.23	117.623	0.735613	25.9156	0.805234
006-17	17.433	78.381	1.1039	19.2443	0.597947
008-8	30.007	148.295	0.583465	17.508	0.543998
008-10	34.522	132.863	0.651235	22.4819	0.698544
012-5	21.527	103.312	0.837512	18.0291	0.560189
014-12	18.423	119.297	0.725291	13.362	0.415176
012-15	5.808	74.139	1.16706	6.77831	0.210611
017-13	17.753	67.825	1.27571	22.6477	0.703693
					0.588558	0.18086	0.00394057

## Sheet: ham oe
control									7/30/2020-3	2020-08-03	7/30/2020-2			7/30/2020-2	7/30/2020-3a	8/3/2020-a			control	ham oe Ase- NB	ham oe Ase+ NB
wild-type type II NB	Tll-GFP	Dpn	Fold change compared to 4'-002 Dpn (C2/Cx=?)	Corrective value (Bx*Dx=?)	Fold change (E2/Ex=?)				1	1	1			1	0.967603	1.08191			1	0.56202	0.589964
006-15	59.054	57.038	1	59.054	1				1.02473	0.803975	0.955683			0.955683	0.991528	0.869829			0.955683	1.31096	0.140327
006-27	88.375	106.17	0.537233	47.4779	0.803975				1.09811	1.07574	0.92655			0.92655	1.06253	1.16386			0.92655	1.2124	0.148842
008-5	100.594	90.319	0.631517	63.5268	1.07574				1.5296	1.14746	0.896372			0.896372	1.48004	1.24145			0.896372	1.07095	0.241505
013-7	98.635	83.025	0.686998	67.762	1.14746				0.874377	0.716299	0.573138			0.573138	0.846049	0.774971			0.573138	1.09803	0.608062
013-10	73.377	98.942	0.576479	42.3003	0.716299				0.510837	0.752911	0.677779			0.677779	0.494287	0.814582			0.677779	1.46838	0.365385
016-10	82.719	106.115	0.537511	44.4624	0.752911				0.929333		1.45065			1.45065	0.899225				1.45065	1.363
					0.916064				1.0791		1.70199			1.70199	1.04414				1.70199	0.820582
									0.614924		0.862025			0.862025	0.595002				0.862025	0.769462
ham oe									1.58183		0.803483			0.803483	1.53059				0.803483	0.780463
Ase- type II NB	Tll-GFP	Dpn	Fold change compared to 4'-002 Dpn (C2/Cx=?)	Corrective value (Bx*Dx=?)	Fold change (E2/Ex=?)						1.14293			1.14293					1.14293	1.06648
006-26	88.161	69.706	0.818265	72.1391	1.22158						0.902593			0.902593					0.902593	1.30872
010-9	160.526	116.299	0.490443	78.7288	1.33317														0.967603	0.978473
010-15-1	83.861	116.643	0.488996	41.0077	0.694411				1.35254	1.22158	0.56202			0.56202	1.30872	1.32164			0.991528	1.17244
010-15-2	92.348	115.365	0.494413	45.6581	0.773158				1.01123	1.33317	1.31096			1.31096	0.978473	1.44237			1.06253	0.700796
012-18	105.915	89.769	0.494413	52.3658	0.886744				1.21169	0.694411	1.2124			1.2124	1.17244	0.75129			1.48004	1.32164
016-10	53.622	49.433	0.635386	34.0707	0.576941				0.72426	0.773158	1.07095			1.07095	0.700796	0.836488			0.846049	1.44237
023-12	127.442	107.979	0.528232	67.319	1.13996					0.886744	1.09803			1.09803		0.959378			0.494287	0.75129
023-16	66.404	89.969	0.528232	35.0767	0.593977					0.576941	1.46838			1.46838		0.624199			0.899225	0.836488
					0.902492					1.13996	1.363			1.363		1.23333			1.04414	0.959378
ham oe										0.593977	0.820582			0.820582		0.64263			0.595002	0.624199
Ase+ type II NB	Tll-GFP	Dpn	Fold change compared to 4'-002 Dpn (C2/Cx=?)	Corrective value (Bx*Dx=?)	Fold change (E2/Ex=?)						0.769462			0.769462					1.53059	1.23333
012-10	42.101	120.406	0.473714	19.9438	0.337722						0.780463			0.780463					1.08191	0.64263
											1.06648			1.06648					0.869829
																			1.16386
																			1.24145
																			0.774971
																			0.814582
																		Average	0.991099	1.0215	0.349014
									0.145026	0.337722	0.589964			0.589964	0.140327	0.365385		SD	0.28615	0.279249	0.200276
									0.153825						0.148842			P-value		0.707214	1.3425e-05
									0.249591						0.241505				n=28	n=23	n=6
									0.628421						0.608062
										0.991099	1.02428	0.916064
											0.967603	1.08191
