# Supplementary material for: Sequential activation of transcriptional repressors promotes progenitor commitment by silencing stem cell identity genes
Source: eLife. 2020 Nov 26;9:e56187. doi: 10.7554/eLife.56187 (PMC7728440; doi:10.7554/eLife.56187)
Supplement: Figure 5—source data 4. [file elife-56187-fig5-data4.xlsx]

## Sheet: NotchRNAi in wt 33 degrees
series	#NBs (Dpn+Ase-)
2018-10-25
series 016	8
series 014	8
series 012	8
series 010	8
series 008	8
series 005	8
series 003	8
2018-11-08
series 024	8
series 020	8
series 018	7
series 016	8
series 014	7
series 011	8
series 009	8
series 006	8
series 004	8
series 002	8
n	17
average	7.88235
staDesv	0.32219

## Sheet: ham-_- 33 degrees
series	#NBs (Dpn+Ase-)
series 036	70
series 027	167
series 025	202
series 022	132
series 010	70
series 008	141
series 006	133
series 004	115
series 001	125
n	9
average	128.333
staDesv	39.598

## Sheet: ham-_- NotchRNAi 33 degrees
series	#NBs (Dpn+Ase-)
series 055	24
series 051	51
series 049	31
series 040	28
series 038	28
series 034	35
series 030	27
series 020	45
series 018	59
n	9
average	36.4444
staDesv	11.6057

## Sheet: statis
		NotchRNAi in wt	ham-_-	ham-_- NotchRNAi
		8	70	24		8	7.88235	128.333	36.4444
		8	167	51		0	0.32219	39.598	11.6057
		8	202	31
		8	132	28
		8	70	28
		8	141	35
		8	133	27
		8	115	45
		8	125	59
		7
		8
		7
		8
		8
		8
		8
		8
	t test (vs. ham null)			0.00011894
