# Supplementary material for: Sequential activation of transcriptional repressors promotes progenitor commitment by silencing stem cell identity genes
Source: eLife. 2020 Nov 26;9:e56187. doi: 10.7554/eLife.56187 (PMC7728440; doi:10.7554/eLife.56187)
Supplement: Figure 5—source data 5. [file elife-56187-fig5-data5.xlsx]

## Sheet: statistics
	wt	hamDf	erm2	hamDf/erm2
	229	548	465	2248
	197	429	655	3153
	205	614	704	3389
	257	611	581	2863
	410	513	926	4027
	339	598	931	3841
	320	634	847	3326
	626	591	563	4110
	486	642	511	3981
	333	706
	528
n	11	6	5	9
average	357.273	588.6	687	3437.56
stadesv	134.302	72.6446	166.814	586.767
t.test (vs.control)		0.000236637	0.000382072	2.16704e-07
t.test (vs.Df_erm2)			6.22989e-07	3.40132e-07
