# Supplementary material for: Sequential activation of transcriptional repressors promotes progenitor commitment by silencing stem cell identity genes
Source: eLife. 2020 Nov 26;9:e56187. doi: 10.7554/eLife.56187 (PMC7728440; doi:10.7554/eLife.56187)
Supplement: Figure 6—source data 1. [file elife-56187-fig6-data1.xlsx]

## Sheet: erm1_2 CNTRL
series	Dpn+Ase- cells (Nb#)							total
series 026	149	294	423	424	519	379	344	2532
series 024	160	330	461	484	406	345	312	2498
series 022	143	309	419	485	525	426	342	2649
series 020	127	130	206	256	312	220	100	1351
series 018	245	266	309	326	298	100	95	1639
series 016	185	249	402	365	211	102		1514
series 014	71	126	207	358	200	78	50	1090
series 012	88	139	288	298	160	63		1036
series 010	137	299	401	452	396	294	103	2082
series 008	89	157	361	403	390	278	136	1814
series 006	187	242	482	325	221	102		1559
series 004	91	124	265	354	321	301	214	1670
series 002	132	298	401	497	436	321	201	2286
								1824.62
								520.648

## Sheet: erm1_2, UAS-ham
series	Dpn+Ase- cells (Nb#)
series 001	34
series 016	56
series 014	47
series 012	30
series 010	35
series 008	29
series 006	30
series 004	36
series 002	33
series 009	37
series 007	29
series 005	22
series 003	31
	34.5385
	8.31695

## Sheet: erm1_2,UAS-HamDeltaZF2(zf1func)
series	Dpn+Ase- cells (Nb#)
series 013	87
series 011	49
series 009	53
series 007	43
series 005	51
series 003	81
series 001	88
	64.5714
	18.3136

## Sheet: statistics
cntrl	ham full	deltaZf2
2532	34	87
2498	56	49
2649	47	53
1351	30	43
1639	35	51
1514	29	81
1090	30	88
1036	36
2082	33
1814	37
1559	29
1670	22
2286	31
	5.23805e-08	6.12294e-08
		0.00606551
