# Supplementary material for: Sequential activation of transcriptional repressors promotes progenitor commitment by silencing stem cell identity genes
Source: eLife. 2020 Nov 26;9:e56187. doi: 10.7554/eLife.56187 (PMC7728440; doi:10.7554/eLife.56187)
Supplement: Figure 6—source data 2. [file elife-56187-fig6-data2.xlsx]

## Sheet: summary
	WorGal4_+; tubGal80ts_+	WorGal4_+; tubGal80ts_UAS-Mi2DN	WorGal4_+; tubGal80ts_UAS-BrmDN	WorGal4_+; tubGal80ts_UAS-HDAC3RNAi		ham++	ham+-
	8	9	11	11	wt	7.9	8.6
	8	9	11	15	mi2[DN]	9.5	9.9
	8	8	9	21	brm[DN]	9.3	9.2
	8	10	9	12	hdac3RNAi	13.7	20.3
	8	9	9	16
	7	10	8	10		0.3	0.5
	8	9	9	13		1.3	1.1
	8	8	9	14		1	1.2
	8	10	8	11		3.2	3.5
	8	10	9
	8	9	8
		13	8
		12	9
		9	8
		10	10
		8	10
		10	11
		8	9
		11	10
		12	11
		9
		9
		8
		9
n	11	25	20	9
average	7.90909	9.54167	9.3	13.6667
stadev	0.28748	1.32222	1.05357	3.19722
	WorGal4_ham-; tubGal80ts_+	WorGal4_ham-; tubGal80ts_UAS-Mi2DN	WorGal4_ham-; tubGal80ts_UAS-BrmDN	WorGal4_ham-; tubGal80ts_UAS-S(z)12RNAi 33402	WorGal4_ham-; tubGal80ts_UAS-Su(var)3-3RNAi 32833	WorGal4_ham-; tubGal80ts_UAS-Su(var)205 RNAi026792	WorGal4_ham-; tubGal80ts_UAS-Su(var)3-9mutant alllele 1	WorGal4_ham-; tubGal80ts_UAS-SHDAC3RNAi
	8	9	9	10	8	9	8	27
	9	10	9	8	9	8	8	25
	9	9	9	8	9	9	9	18
	9	11	12	12	9	8	9	22
	8	9	10	9	8	10	8	26
	9	11	8	9	10	8	9	17
	8	12	8	8	9	8		23
	8	10	10	9	9	9		18
	9	8	9	10	10	9		15
	9	8	8	10		8		19
	8	9						19
	9	10						16
		9						18
		10						21
		10						20
		12
		9
		10
		11
		10
n	12	20	10	10	9	10	6	15
average	8.58333	9.85	9.2	9.3	9	8.6	8.5	20.2667
stadev	0.493007	1.10793	1.16619	1.18743	0.666667	0.663325	0.5	3.53019
