# Supplementary material for: Sequential activation of transcriptional repressors promotes progenitor commitment by silencing stem cell identity genes
Source: eLife. 2020 Nov 26;9:e56187. doi: 10.7554/eLife.56187 (PMC7728440; doi:10.7554/eLife.56187)
Supplement: Figure 6—source data 3. [file elife-56187-fig6-data3.xlsx]

## Sheet: Sheet1
	wor aseGal80
	ctrl				>skd RNAi			>kto RNAi			>HDAC3 RNAi
	ctrl	erm1/+	erm2/+	hamsk1_+	ctrl	erm1/+	erm2/+	ctrl	erm1/+	erm2/+	ctrl	erm1/+	erm2/+	Hdac3RNAi in hamsk1_+
brain 1	8	8	8	9	8	8	42	9	21	56	15	39	58	27
brain 2	8	8	8	8	8	8	52	12	32	63	17	34	59	25
brain 3	8	8	8	8	8	7	75	13	30	62	11	36	50	18
brain 4	7	7	9	8	7	9	55	10	19	73	17	38	52	22
brain 5	8	8	8	9	8	8	39	11	25	68	15	55	38	26
brain 6	8	8	8	10	8	8	45	9	21	86	9	57	24	17
brain 7	7	9	9	8	7	10	39	16	24	66	13	62		23
brain 8	8	8	8	9	8	7	30	13	16	63	11	61		18
brain 9	8	8	8	8	8	8	35	14	38		15	67		15
brain 10	8	8	8	8	8	8	34	15	37		21	60		19
brain 11				8		8			52		12	59		19
brain 12				9		8			56		16	65		16
brain 13						9			31		10	47		18
brain 14						8			28		13			21
brain 15									52		14			20
brain 16									45		11
average	7.8	8	8.2	12	7.8	8.14286	44.6	12.2	32.9375	67.125	13.75	52.3077	46.8333	20.2667
st deviation	0.421637	0.471405	0.421637	8.5	0.421637	0.770329	13.2262	2.4404	12.6305	9.07803	3.1305	11.87	13.4821	3.53019
Ttest (erm1/+ vs erm2/+)			0.330565	0.645497			6.06295e-10			7.92067e-07			0.382265	9.38411e-07
														0.00436348
